# Supplementary material for: Aquatic insects dealing with dehydration: do desiccation resistance traits differ in species with contrasting habitat preferences?
Source: PeerJ journal article supplement (doi:10.7717/peerj.2382), 2016-08-31

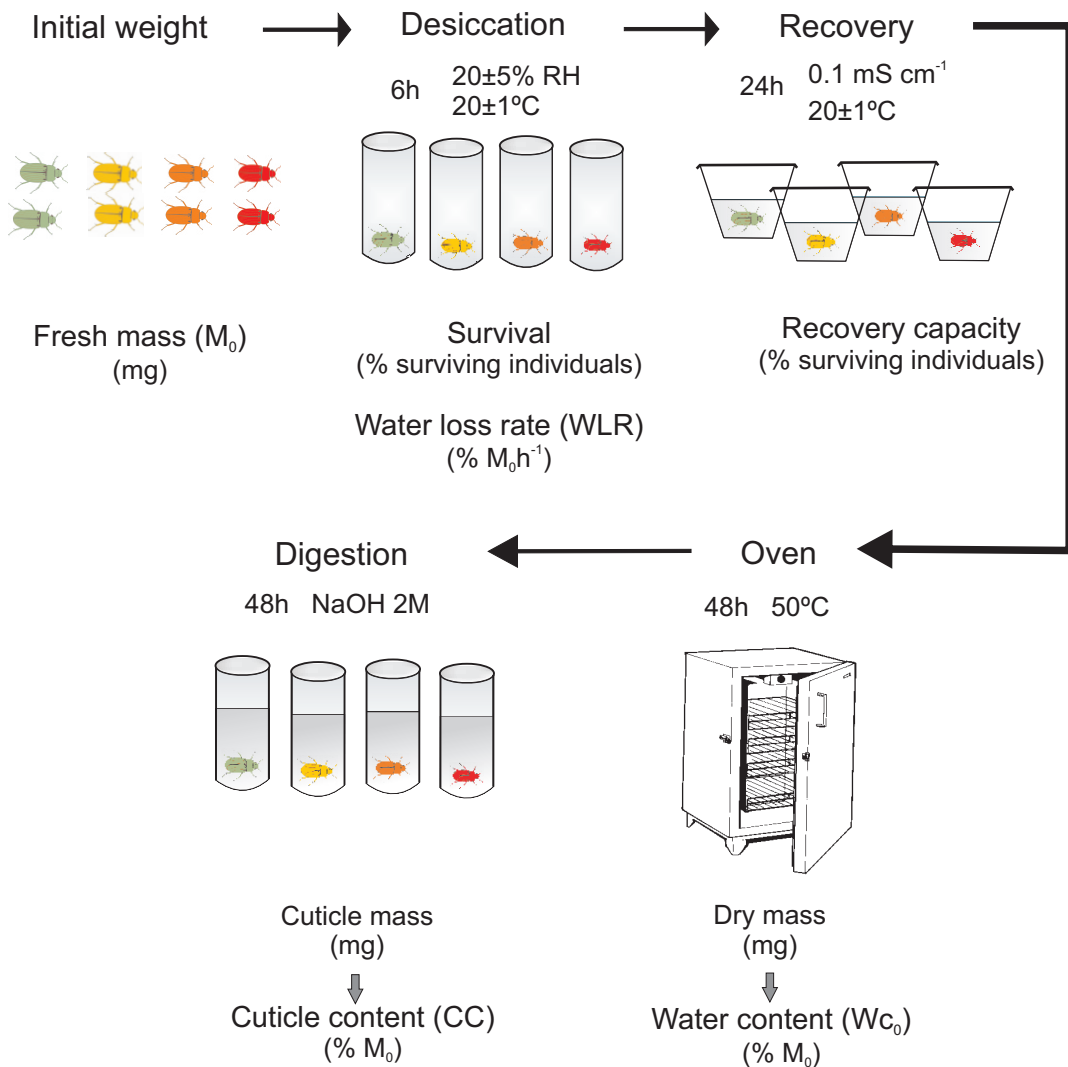

Supplement: Figure_S1.pdf [file Figure_S1.pdf]
